# Supplementary material for: Membrane domain modulation of Aβ1–42oligomer interactions with supported lipid bilayers: an atomic force microscopy investigation
Source: Royal Society of Chemistry journal article supplement (doi:10.1039/c9nr06361g), 2019-01-01
Supplement: c9nr06361g1.pdf [file c9nr06361g1.pdf]

## Membrane domains modulate A $\beta$ <sub>1-42</sub> oligomer interactions with Supported Lipid Bilayers: an Atomic Force Microscopy investigation

Mehdi Azouz,<sup>a,b</sup> Christophe Cullin,<sup>a</sup> Sophie Lecomte,<sup>a</sup> and Michel Lafleur\*<sup>b</sup>

### Supplementary Information

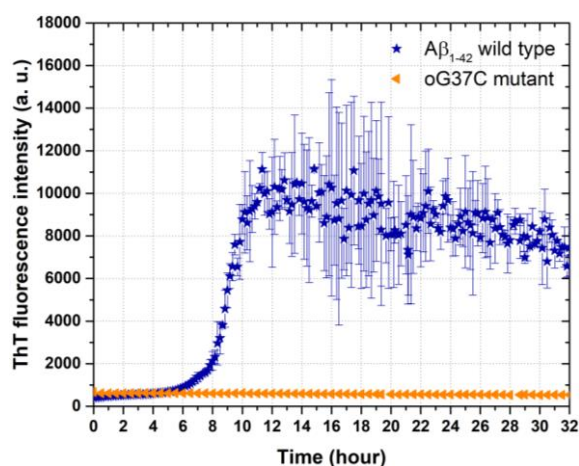

**Appendix 1** Thioflavin T fluorescence intensity variation in function of time for A $\beta$ <sub>1-42</sub> (blue stars) and G37C peptides (orange triangles). Concentration was 5  $\mu$ M in a total volume of 100  $\mu$ L of buffer.

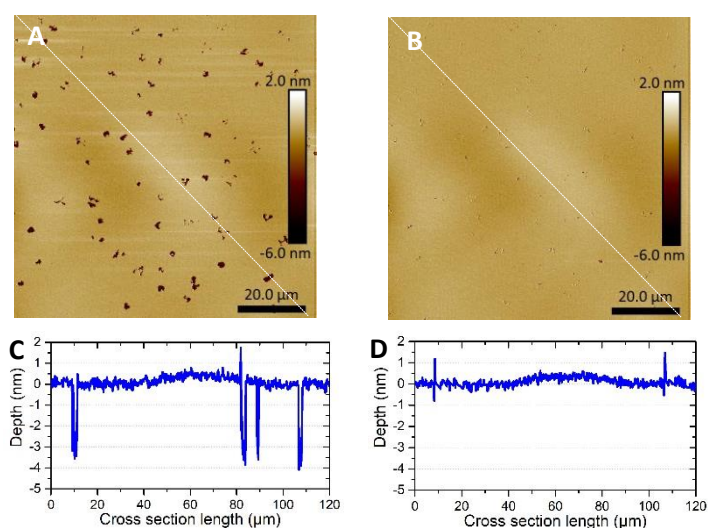

**Appendix 2** AFM images ( $90 \times 90 \mu\text{m}^2$ ): Coalescence phenomenon as illustrated on the disappearance of defects on a POPC bilayer (A) and after 1 h (B), recorded on the same zone. Graphs C and D represent the cross sections corresponding to the dashed lines on images A and B respectively.

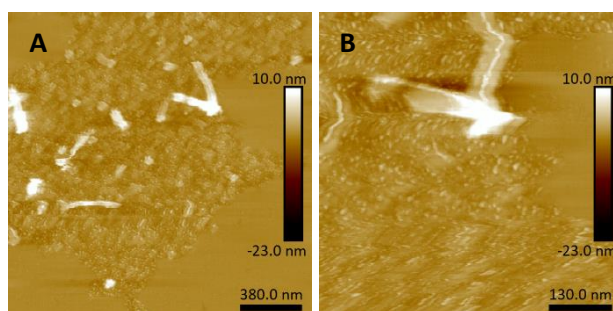

**Appendix 3** AFM images of the fibrils formed on the POPC/GM1 bilayer; magnifications are  $1.9 \times 1.9 \mu\text{m}^2$  (A) and  $650 \times 650 \text{nm}^2$  (B).
